# Supplementary material for: Unraveling biogeographical patterns and environmental drivers of soil fungal diversity at the French national scale
Source: Copernicus journal article supplement (doi:10.5194/soil-10-251-2024), 2024-04-11
Supplement: Supplementary file 1 [file soil-10-251-2024-supplement.zip]

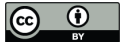

*Supplement of*

## **Unraveling biogeographical patterns and environmental drivers of soil fungal diversity at the French national scale**

**Christophe Djemiel et al.**

*Correspondence to:* Lionel Ranjard ([lionel.ranjard@inrae.fr](mailto:lionel.ranjard@inrae.fr))

- [soil-10-251-2024-supplement-title-page.pdf](#)
- [.DS\\_Store](#)
- [.lock.tables\\_CD.xlsx#](#)
- [supp-figures\\_CD.docx](#)
- [tables\\_CD.xlsx](#)

The copyright of individual parts of the supplement might differ from the article licence.
